# Supplementary material for: Fatostatin induces ferroptosis through inhibition of the AKT/mTORC1/GPX4 signaling pathway in glioblastoma
Source: PubMed Central journal article supplement (PMC10039896; doi:10.1038/s41419-023-05738-8), 2023-03-25
Supplement: 41419_2023_5738_MOESM6_ESM.pdf [file 41419_2023_5738_MOESM6_ESM.pdf]

This document certifies that the manuscript

## **Fatostatin induces ferroptosis through inhibition of the AKT/mTORC1/GPX4 signaling pathway in glioblastoma**

prepared by the authors

**Jiayang Cai 1,2#, Zhang Ye 1,2#, Ligu Ye<sup>3</sup>, Lun Gao 1,2, Yixuan Wang<sup>1,2</sup>, Qian sun 1,2, Shiao Tong 1,2, Shenqi Zhang<sup>1,2</sup>, Liquan Wu<sup>1,2</sup>, Ji'an Yang 1,2, \*, Qianxue Chen 1,2, \***

was edited for proper English language, grammar, punctuation, spelling, and overall style by one or more of the highly qualified native English speaking editors at AJE.

This certificate was issued on **February 16, 2023** and may be verified on the [AJE website](#) using the verification code **AF16-B429-6DE1-B470-BC16**.

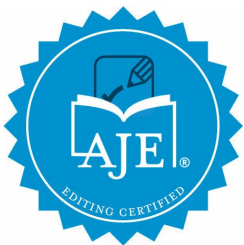

Neither the research content nor the authors' intentions were altered in any way during the editing process. Documents receiving this certification should be English-ready for publication; however, the author has the ability to accept or reject our suggestions and changes. To verify the final AJE edited version, please visit our verification page at [aje.com/certificate](#). If you have any questions or concerns about this edited document, please contact AJE at [support@aje.com](mailto:support@aje.com).
